# Supplementary material for: Candidatus Anthektikosiphon siderophilum OHK22, a New Member of the Chloroflexi Family Herpetosiphonaceae from Oku-okuhachikurou Onsen
Source: PubMed Central journal article supplement (PMC7511795; doi:10.1264/jsme2.me20030), 2020-07-29
Supplement: 35_20030_s3.pdf [file 35_20030_s3.pdf]

**Supplemental Table 1:** Number of proteins encoded by Herpetosiphonaceae genomes associated with iron acquisition and metabolism as determined by FeGenie.

**Supplemental Table 2:** Annotated proteins encoded in the OHK22 genome as determined by RAST.
